# Supplementary material
Source: Research Square preprint supplement (doi:10.21203/rs.3.rs-9144344/v1)
Supplement: Supplementary file 1 [file 529665d7ead3e9c3d9431137.docx]

**Supplementary Figure 1.** Global pairwise amino acid sequence alignment of the tail fiber proteins VN32 and VN33 from bacteriophage 418T1 generated using EMBOSS NEEDLE. Identical residues are indicated by vertical bars (|), and similar residues by colons (:), based on the EBLOSUM62 scoring matrix; weakly similar residues are indicated by periods (.). Gaps introduced for optimal alignment are shown as hyphens. VN32 (184 amino acids) and VN33 (222 amino acids) share 66.5% amino acid identity and 70.0% similarity.

**Supplementary Figure 2.** Uncropped SDS-PAGE gel image of purified recombinant proteins corresponding to Figure 4c.

**Supplementary Figure 3. AlphaFold-predicted structure of VN33 highlighting N- and C-terminal regions.**

Cartoon representation of full-length VN33 generated by AlphaFold. The N-terminal region (residues 1–83) is shown in green and the C-terminal region (residues 84–222) in magenta. The boundary at residues 83/84 is indicated in white.

**Supplementary Table 1**. List of *Helicobacter pylori* strains used in the phage host range assay and their NCBI genome assembly accession numbers with references.

**Supplementary Table 2**. Predicted open reading frames (ORFs) of bacteriophage 418T1 and their putative functions, as annotated by Pharokka.

**Supplementary Table 3**. Primers used for cloning in this study.
